# Supplementary material for: Dyslipidemia and reference values for fasting plasma lipid concentrations in Danish/North-European White children and adolescents
Source: Springer Nature journal article supplement (doi:10.1186/s12887-017-0868-y), 2017-04-28

# Triglycerides

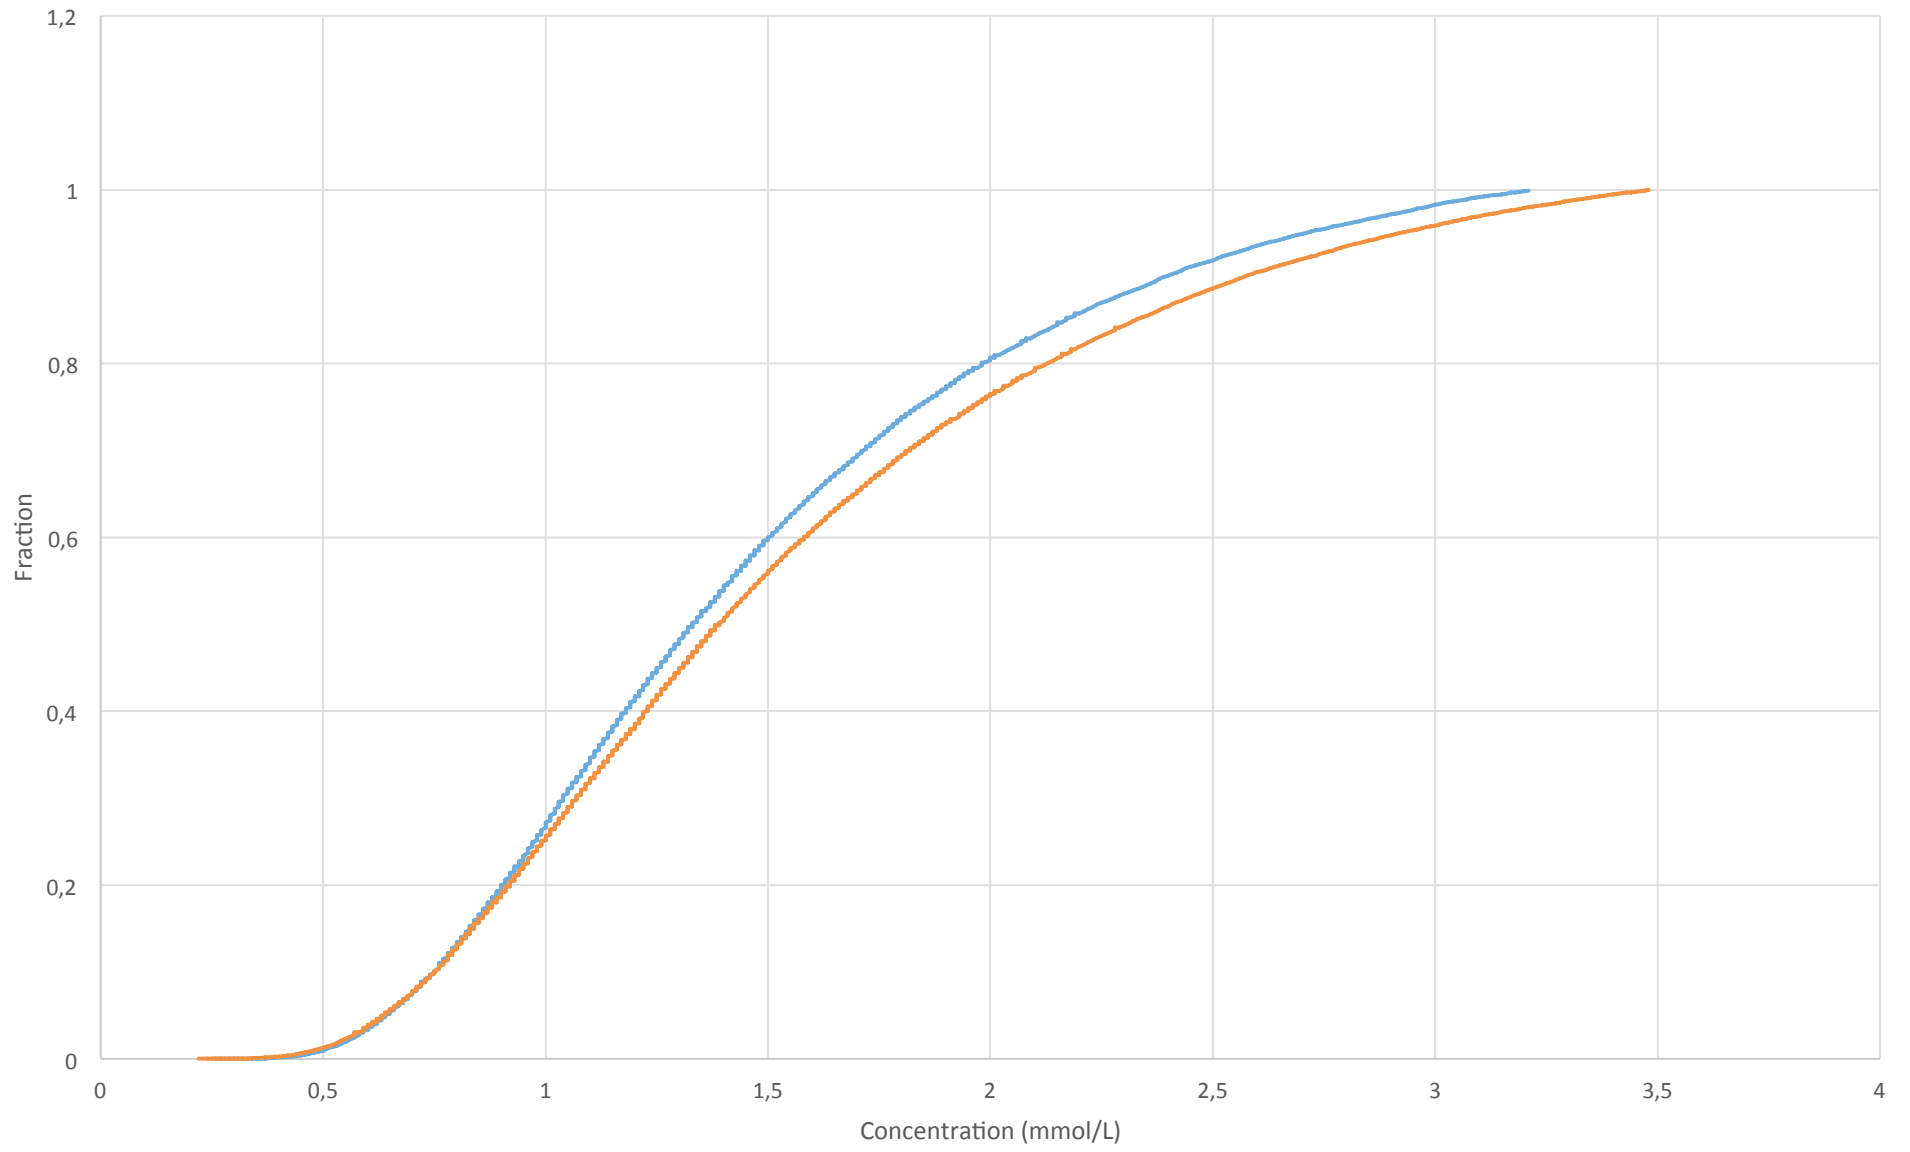

Supplement: MOESM4 [file 12255586]
